# Supplementary material
Source: PubMed Central journal article supplement (PMC11212726)
Supplement: JI_2300308_Supplemental_1.pdf [file JI_2300308_Supplemental_1.pdf]

**Supplemental Table II. Associations of HLA homozygosity and HED with the best objective response.**

|                                       | <b>OR†</b> | <b>95% CI</b> | <b><i>p</i> Value</b> | <b>1-β</b> |
|---------------------------------------|------------|---------------|-----------------------|------------|
| <b>Homozygosity of HLA allele</b>     |            |               |                       |            |
| HLA-A                                 | 1.37       | 0.68–2.74     | 0.38                  | 0.109      |
| HLA-B                                 | 0.90       | 0.35–2.30     | 0.82                  | NA         |
| HLA-C                                 | 1.55       | 0.69–3.47     | 0.29                  | 0.136      |
| HLA-DQB1                              | 0.37       | 0.13–1.03     | 0.058                 | 0.399      |
| HLA-DRB1                              | 0.54       | 0.19–1.60     | 0.27                  | 0.111      |
| <b>At least 1 homozygosity of HLA</b> |            |               |                       |            |
| HLA-I                                 | 1.61       | 0.90–2.91     | 0.11                  | 0.314      |
| HLA-II                                | 0.34       | 0.12–0.96     | 0.042                 | 0.461      |
| <b>HED high of HLA allele</b>         |            |               |                       |            |
| HLA-A                                 | 0.86       | 0.51–1.47     | 0.59                  | 0.047      |
| HLA-B                                 | 0.67       | 0.39–1.15     | 0.15                  | 0.225      |
| HLA-C                                 | 1.23       | 0.72–2.10     | 0.44                  | 0.087      |
| HLA-DQB1                              | 1.12       | 0.66–1.91     | 0.68                  | 0.047      |
| HLA-DRB1                              | 1.29       | 0.76–2.20     | 0.35                  | 0.114      |

CI, confidence interval; HED, HLA evolutionary divergence; OR, odds ratio.

†Reference is SD/PD.

**Supplemental Table III. Associations of HLA homozygosity and HED with radiographic progression-free survival.**

|                                       | <b>HR</b> | <b>95% CI</b> | <b><i>p</i> Value</b> |
|---------------------------------------|-----------|---------------|-----------------------|
| <b>Homozygosity of HLA allele</b>     |           |               |                       |
| HLA-A                                 | 0.92      | 0.58–1.45     | 0.71                  |
| HLA-B                                 | 1.01      | 0.57–1.79     | 0.97                  |
| HLA-C                                 | 1.15      | 0.69–1.91     | 0.60                  |
| HLA-DQB1                              | 1.06      | 0.61–1.84     | 0.84                  |
| HLA-DRB1                              | 1.00      | 0.71–1.40     | 0.99                  |
| <b>At least 1 homozygosity of HLA</b> |           |               |                       |
| HLA-I                                 | 0.98      | 0.67–1.43     | 0.92                  |
| HLA-II                                | 1.13      | 0.66–1.93     | 0.66                  |
| <b>HED high of HLA allele</b>         |           |               |                       |
| HLA-A                                 | 1.09      | 0.78–1.53     | 0.62                  |
| HLA-B                                 | 1.09      | 0.77–1.52     | 0.63                  |
| HLA-C                                 | 0.72      | 0.51–1.02     | 0.06                  |
| HLA-DQB1                              | 1.13      | 0.80–1.58     | 0.49                  |
| HLA-DRB1                              | 1.00      | 0.71–1.40     | 0.99                  |

CI, confidence interval; HED, HLA evolutionary divergence; HR, hazard ratio.

**Supplemental Table IV. Associations of HLA homozygosity and HED with severe adverse events.**

|                                       | <b>OR†</b> | <b>95% CI</b> | <b><i>p</i> Value</b> |
|---------------------------------------|------------|---------------|-----------------------|
| <b>Homozygosity of HLA allele</b>     |            |               |                       |
| HLA-A                                 | 0.67       | 0.26–1.72     | 0.41                  |
| HLA-B                                 | 0.41       | 0.09–1.84     | 0.25                  |
| HLA-C                                 | 0.46       | 0.13–1.59     | 0.22                  |
| HLA-DQB1                              | 0.86       | 0.28–2.69     | 0.80                  |
| HLA-DRB1                              | 1.23       | 0.38–3.97     | 0.73                  |
| <b>At least 1 homozygosity of HLA</b> |            |               |                       |
| HLA-I                                 | 0.78       | 0.37–1.65     | 0.51                  |
| HLA-II                                | 0.81       | 0.26–2.52     | 0.72                  |
| <b>HED high of HLA allele</b>         |            |               |                       |
| HLA-A                                 | 1.48       | 0.77–2.87     | 0.24                  |
| HLA-B                                 | 1.09       | 0.57–2.11     | 0.79                  |
| HLA-C                                 | 0.93       | 0.48–1.79     | 0.82                  |
| HLA-DQB1                              | 0.87       | 0.45–1.67     | 0.67                  |
| HLA-DRB1                              | 0.87       | 0.45–1.67     | 0.67                  |

CI, confidence interval; HED, HLA evolutionary divergence; OR, odds ratio.

†Reference is no severe adverse event.

**Supplemental Table V. Association of HLA supertype combination with cancer specific survival.**

|                                                        | Frequency, n (%) | HR   | 95% CI    | <i>p</i> Value |
|--------------------------------------------------------|------------------|------|-----------|----------------|
| <b>Combination of HLA-A supertype (<i>n</i> = 222)</b> |                  |      |           |                |
| A01 or A02                                             | 127 (57.2%)      | 0.99 | 0.50–1.97 | 0.98           |
| A01 or A03                                             | 149 (67.1%)      | 0.89 | 0.45–1.76 | 0.73           |
| A01 or A24                                             | 171 (77.0%)      | 1.38 | 0.57–3.32 | 0.48           |
| A02 or A03                                             | 159 (71.6%)      | 0.61 | 0.25–1.50 | 0.28           |
| A02 or A24                                             | 185 (83.3%)      | 0.87 | 0.41–1.82 | 0.70           |
| A03 or A24                                             | 193 (86.9%)      | 1.60 | 0.56–4.55 | 0.38           |
| <b>Combination of HLA-B supertype (<i>n</i> = 222)</b> |                  |      |           |                |
| B07 or B27                                             | 143 (64.4%)      | 0.68 | 0.35–1.35 | 0.27           |
| B07 or B44                                             | 189 (85.1%)      | 1.11 | 0.46–2.68 | 0.83           |
| B07 or B58                                             | 129 (58.1%)      | 0.58 | 0.29–1.14 | 0.11           |
| B07 or B62                                             | 188 (84.7%)      | 0.92 | 0.35–2.37 | 0.86           |
| B27 or B44                                             | 115 (51.8%)      | 1.53 | 0.77–3.03 | 0.22           |
| B27 or B58                                             | 25 (11.3%)       | 1.64 | 0.68–3.97 | 0.27           |
| B27 or B62                                             | 117 (52.7%)      | 1.31 | 0.64–2.65 | 0.46           |
| B44 or B58                                             | 103 (46.4%)      | 1.15 | 0.58–2.28 | 0.69           |
| B44 or B62                                             | 166 (74.8%)      | 0.77 | 0.36–1.65 | 0.50           |
| B58 or B62                                             | 103 (46.4%)      | 0.99 | 0.50–1.94 | 0.97           |

CI, confidence interval; HR, hazard ratio.

Reference is a non-carrier of each HLA supertype combination.
